# Supplementary material for: Epidemiological and numerical simulation of rabies spreading from canines to various human populations in mainland China
Source: PubMed Central journal article supplement (PMC8312940; doi:10.1371/journal.pntd.0009527), 2021-07-14
Supplement: pntd.0009527.s001.pdf [file pntd.0009527.s001.pdf]

## S1\_Table

**Parameters of SEIR model for human deaths from rabies for different regions, different age and gender groups and different occupational groups in mainland China.**

| Parameters  | Male<45                | Male>45                | Female<45              | Female>45              |
|-------------|------------------------|------------------------|------------------------|------------------------|
| A           | $2.34 \times 10^5$     | $2.34 \times 10^5$     | $2.34 \times 10^5$     | $2.34 \times 10^5$     |
| $\lambda_D$ | 0.1666                 | 0.1666                 | 0.1666                 | 0.1666                 |
| $\gamma_D$  | 0.49                   | 0.49                   | 0.49                   | 0.49                   |
| $\sigma_D$  | 0.95                   | 0.95                   | 0.95                   | 0.95                   |
| $m_D$       | 0.0064                 | 0.0064                 | 0.0064                 | 0.0064                 |
| $k_D$       | 0.09                   | 0.09                   | 0.09                   | 0.09                   |
| $\mu_D$     | 1                      | 1                      | 1                      | 1                      |
| B           | $7.00 \times 10^5$     | $8.72 \times 10^5$     | $6.40 \times 10^5$     | $8.63 \times 10^5$     |
| $\lambda_H$ | 0.1666                 | 0.1666                 | 0.1666                 | 0.1666                 |
| $\gamma_H$  | 0.5                    | 0.5                    | 0.5                    | 0.5                    |
| $\sigma_H$  | 0.5                    | 0.5                    | 0.5                    | 0.5                    |
| $m_H$       | 0.001912               | 0.001783               | 0.001988               | 0.00164                |
| $k_H$       | 0.54                   | 0.54                   | 0.54                   | 0.54                   |
| $\mu_H$     | 1                      | 1                      | 1                      | 1                      |
| $S_D$       | $3.30 \times 10^7$     | $3.30 \times 10^7$     | $3.30 \times 10^7$     | $3.30 \times 10^7$     |
| $E_D$       | $2.20 \times 10^4$     | $2.20 \times 10^4$     | $2.20 \times 10^4$     | $2.20 \times 10^4$     |
| $I_D$       | $1.10 \times 10^4$     | $1.10 \times 10^4$     | $1.10 \times 10^4$     | $1.10 \times 10^4$     |
| $R_D$       | $3.30 \times 10^6$     | $3.30 \times 10^6$     | $3.30 \times 10^6$     | $3.30 \times 10^6$     |
| $S_H$       | $4.56 \times 10^8$     | $2.03 \times 10^8$     | $4.34 \times 10^8$     | $2.03 \times 10^8$     |
| $E_H$       | 110                    | 66                     | 110                    | 54                     |
| $I_H$       | 55                     | 33                     | 55                     | 27                     |
| $R_H$       | $2.10 \times 10^7$     | $9.37 \times 10^6$     | $2.00 \times 10^7$     | $9.37 \times 10^6$     |
| $a_D$       | $9.85 \times 10^{-8}$  | $1.00 \times 10^{-7}$  | $9.82 \times 10^{-8}$  | $1.00 \times 10^{-7}$  |
| $a_H$       | $2.84 \times 10^{-11}$ | $4.64 \times 10^{-11}$ | $1.28 \times 10^{-11}$ | $2.38 \times 10^{-11}$ |
| $b_D$       | 0.42                   | 0.42                   | 0.42                   | 0.42                   |
| $b_H$       | 0.33                   | 0.33                   | 0.33                   | 0.33                   |

**S1\_Table continued**

| Parameters  | Region1                | Region2                | Region3                | Region4                |
|-------------|------------------------|------------------------|------------------------|------------------------|
| A           | $4.15 \times 10^4$     | $5.50 \times 10^4$     | $5.25 \times 10^4$     | $6.50 \times 10^4$     |
| $\lambda_D$ | 0.1666                 | 0.1666                 | 0.1666                 | 0.1666                 |
| $\gamma_D$  | 0.49                   | 0.49                   | 0.49                   | 0.49                   |
| $\sigma_D$  | 0.95                   | 0.95                   | 0.95                   | 0.95                   |
| $m_D$       | 0.0064                 | 0.0064                 | 0.0064                 | 0.0064                 |
| $k_D$       | 0.09                   | 0.09                   | 0.09                   | 0.09                   |
| $\mu_D$     | 1                      | 1                      | 1                      | 1                      |
| B           | $2.87 \times 10^5$     | $3.11 \times 10^5$     | $2.98 \times 10^5$     | $3.66 \times 10^5$     |
| $\lambda_H$ | 0.1666                 | 0.1666                 | 0.1666                 | 0.1666                 |
| $\gamma_H$  | 0.5                    | 0.5                    | 0.5                    | 0.5                    |
| $\sigma_H$  | 0.5                    | 0.5                    | 0.5                    | 0.5                    |
| $m_H$       | 0.000632               | 0.000651               | 0.000643               | 0.000666               |
| $k_H$       | 0.54                   | 0.54                   | 0.54                   | 0.54                   |
| $\mu_H$     | 1                      | 1                      | 1                      | 1                      |
| $S_D$       | $6.04 \times 10^6$     | $7.88 \times 10^6$     | $7.15 \times 10^6$     | $9.17 \times 10^6$     |
| $E_D$       | $4.03 \times 10^3$     | $5.25 \times 10^3$     | $4.77 \times 10^3$     | $6.11 \times 10^3$     |
| $I_D$       | $2.01 \times 10^3$     | $2.63 \times 10^3$     | $2.38 \times 10^3$     | $3.06 \times 10^3$     |
| $R_D$       | $6.04 \times 10^5$     | $7.88 \times 10^5$     | $7.15 \times 10^5$     | $9.17 \times 10^5$     |
| $S_H$       | $2.39 \times 10^8$     | $3.10 \times 10^8$     | $2.82 \times 10^8$     | $3.61 \times 10^8$     |
| $E_H$       | 170                    | 34                     | 44                     | 38                     |
| $I_H$       | 85                     | 17                     | 22                     | 19                     |
| $R_H$       | $1.10 \times 10^7$     | $1.10 \times 10^7$     | $1.43 \times 10^7$     | $1.30 \times 10^7$     |
| $a_D$       | $5.45 \times 10^{-7}$  | $4.29 \times 10^{-7}$  | $4.56 \times 10^{-7}$  | $3.68 \times 10^{-7}$  |
| $a_H$       | $4.28 \times 10^{-10}$ | $6.53 \times 10^{-11}$ | $5.58 \times 10^{-11}$ | $2.88 \times 10^{-11}$ |
| $b_D$       | 0.42                   | 0.42                   | 0.42                   | 0.42                   |
| $b_H$       | 0.23                   | 0.43                   | 0.43                   | 0.43                   |

**S1\_Table continued**

| Parameters  | Children               | Students               | Workers                | Farmers                |
|-------------|------------------------|------------------------|------------------------|------------------------|
| A           | $2.34 \times 10^5$     | $2.34 \times 10^5$     | $2.34 \times 10^5$     | $2.34 \times 10^5$     |
| $\lambda_D$ | 0.1666                 | 0.1666                 | 0.1666                 | 0.1666                 |
| $\gamma_D$  | 0.49                   | 0.49                   | 0.49                   | 0.49                   |
| $\sigma_D$  | 0.95                   | 0.95                   | 0.95                   | 0.95                   |
| $m_D$       | 0.0064                 | 0.0064                 | 0.0064                 | 0.0064                 |
| $k_D$       | 0.09                   | 0.09                   | 0.09                   | 0.09                   |
| $\mu_D$     | 1                      | 1                      | 1                      | 1                      |
| B           | $1.34 \times 10^6$     | $1.67 \times 10^6$     | $2.57 \times 10^5$     | $6.70 \times 10^5$     |
| $\lambda_H$ | 0.1666                 | 0.1666                 | 0.1666                 | 0.1666                 |
| $\gamma_H$  | 0.5                    | 0.5                    | 0.5                    | 0.5                    |
| $\sigma_H$  | 0.5                    | 0.5                    | 0.5                    | 0.5                    |
| $m_H$       | 0.0119                 | 0.00694                | 0.002                  | 0.0006                 |
| $k_H$       | 0.54                   | 0.54                   | 0.54                   | 0.54                   |
| $\mu_H$     | 1                      | 1                      | 1                      | 1                      |
| $S_D$       | $3.30 \times 10^7$     | $3.30 \times 10^7$     | $3.30 \times 10^7$     | $3.30 \times 10^7$     |
| $E_D$       | $2.20 \times 10^4$     | $2.20 \times 10^4$     | $2.20 \times 10^4$     | $2.20 \times 10^4$     |
| $I_D$       | $1.10 \times 10^4$     | $1.10 \times 10^4$     | $1.10 \times 10^4$     | $1.10 \times 10^4$     |
| $R_D$       | $3.30 \times 10^6$     | $3.30 \times 10^6$     | $3.30 \times 10^6$     | $3.30 \times 10^6$     |
| $S_H$       | $1.12 \times 10^8$     | $2.40 \times 10^8$     | $2.00 \times 10^8$     | $6.50 \times 10^8$     |
| $E_H$       | 34                     | 46                     | 18                     | 174                    |
| $I_H$       | 17                     | 23                     | 9                      | 87                     |
| $R_H$       | $5.17 \times 10^6$     | $1.11 \times 10^7$     | $9.23 \times 10^6$     | $3.00 \times 10^7$     |
| $a_D$       | $9.82 \times 10^{-8}$  | $9.74 \times 10^{-8}$  | $9.96 \times 10^{-8}$  | $1.01 \times 10^{-7}$  |
| $a_H$       | $3.28 \times 10^{-11}$ | $2.90 \times 10^{-11}$ | $1.26 \times 10^{-11}$ | $2.52 \times 10^{-11}$ |
| $b_D$       | 0.42                   | 0.42                   | 0.42                   | 0.42                   |
| $b_H$       | 0.33                   | 0.33                   | 0.33                   | 0.33                   |
