# Supplementary material for: Epidemiological and numerical simulation of rabies spreading from canines to various human populations in mainland China
Source: PubMed Central journal article supplement (PMC8312940; doi:10.1371/journal.pntd.0009527), 2021-07-14
Supplement: pntd.0009527.s002.pdf [file pntd.0009527.s002.pdf]

## S2\_Table

**Mann Kendall trend test of different age groups for men and women.**

| Male Age Group | Proportion | 95CI             | mk_test_Trend | h     | p        | z       |
|----------------|------------|------------------|---------------|-------|----------|---------|
| 0-5            | 0.0306     | (0.0231,0.0382)  | decreasing    | TRUE  | 0.029448 | -2.1774 |
| 5-10           | 0.0467     | (0.0190,0.0744)  | decreasing    | TRUE  | 0.000007 | -4.5089 |
| 10-15          | 0.0397     | (0.0080,0.0713)  | decreasing    | TRUE  | 0.000001 | -4.8497 |
| 15-20          | 0.0186     | (-0.0011,0.0383) | decreasing    | TRUE  | 0.000005 | -4.5528 |
| 20-25          | 0.0162     | (0.0070,0.0254)  | no trend      | FALSE | 0.074825 | -1.7815 |
| 25-30          | 0.0201     | (0.0137,0.0266)  | no trend      | FALSE | 0.276278 | -1.0887 |
| 30-35          | 0.0273     | (0.0165,0.0381)  | decreasing    | TRUE  | 0.047761 | -1.9795 |
| 35-40          | 0.0377     | (0.0224,0.0529)  | decreasing    | TRUE  | 0.029448 | -2.1774 |
| 40-45          | 0.0572     | (0.0365,0.0779)  | no trend      | FALSE | 0.42848  | -0.7918 |
| 45-50          | 0.0612     | (0.0325,0.0900)  | increasing    | TRUE  | 0.007533 | 2.6723  |
| 50-55          | 0.0685     | (0.0455,0.0915)  | no trend      | FALSE | 0.766525 | 0.2969  |
| 55-60          | 0.0737     | (0.0419,0.1055)  | no trend      | FALSE | 0.373053 | 0.8908  |
| 60-65          | 0.0729     | (0.0324,0.1133)  | increasing    | TRUE  | 0.000005 | 4.5528  |
| 65-70          | 0.0563     | (0.0193,0.0934)  | increasing    | TRUE  | 0.000169 | 3.761   |
| 70-75          | 0.0391     | (0.0259,0.0523)  | increasing    | TRUE  | 0.000765 | 3.3651  |
| 75-80          | 0.0229     | (0.0056,0.0402)  | increasing    | TRUE  | 0.004101 | 2.8703  |
| 80-85          | 0.0091     | (0.0022,0.0159)  | increasing    | TRUE  | 0.007533 | 2.6723  |
| 85-100         | 0.0032     | (-0.0005,0.0069) | increasing    | TRUE  | 0.000113 | 3.86    |

**S2\_Table continued**

| Female Age Group | Proportion | 95CI             | mk_test_Trend | h     | p        | z       |
|------------------|------------|------------------|---------------|-------|----------|---------|
| 0-5              | 0.0163     | (0.0078,0.0248)  | decreasing    | TRUE  | 0.029448 | -2.1774 |
| 5-10             | 0.0237     | (0.0083,0.0390)  | decreasing    | TRUE  | 0.029448 | -2.1774 |
| 10-15            | 0.0173     | (0.0069,0.0277)  | decreasing    | TRUE  | 0.000113 | -3.86   |
| 15-20            | 0.0066     | (0.0010,0.0123)  | decreasing    | TRUE  | 0.000169 | -3.761  |
| 20-25            | 0.0038     | (-0.0004,0.0081) | decreasing    | TRUE  | 0.022822 | -2.2764 |
| 25-30            | 0.0055     | (0.0004,0.0106)  | no trend      | FALSE | 0.921159 | -0.099  |
| 30-35            | 0.0079     | (0.0011,0.0147)  | decreasing    | TRUE  | 0.001539 | -3.1672 |
| 35-40            | 0.0142     | (0.0035,0.0250)  | decreasing    | TRUE  | 0.000765 | -3.3651 |
| 40-45            | 0.02       | (0.0111,0.0288)  | decreasing    | TRUE  | 0.002153 | -3.0682 |
| 45-50            | 0.022      | (0.0088,0.0352)  | no trend      | FALSE | 0.692181 | -0.3959 |
| 50-55            | 0.0297     | (0.0165,0.0428)  | no trend      | FALSE | 0.3223   | -0.9897 |
| 55-60            | 0.0303     | (0.0163,0.0444)  | no trend      | FALSE | 0.843085 | -0.1979 |
| 60-65            | 0.0311     | (0.0166,0.0456)  | increasing    | TRUE  | 0.000075 | 3.959   |
| 65-70            | 0.0256     | (0.0043,0.0469)  | increasing    | TRUE  | 0.017531 | 2.3754  |
| 70-75            | 0.0222     | (0.0104,0.0339)  | increasing    | TRUE  | 0.013348 | 2.4744  |
| 75-80            | 0.0134     | (0.0066,0.0201)  | no trend      | FALSE | 0.3223   | 0.9897  |
| 80-85            | 0.0065     | (0.0002,0.0127)  | increasing    | TRUE  | 0.047761 | 1.9795  |
| 85-100           | 0.0029     | (-0.0012,0.0070) | no trend      | FALSE | 0.399612 | 0.8423  |
